# Supplementary material
Source: HighWire-hosted journal article supplement (http://www.cmaj.ca/highwire/filestream/80438/field_highwire_adjunct_files/0/210437-res-1-at.pdf)
Supplement: 210437-res-1-at.pdf [file 210437-res-1-at.pdf]

**Table S1** – Comparison of absolute number of physicians in our first data source across gender groups and the OPHRDC dataset.

| Specialty                                      | Primary Data Source Men | Primary Data Source Women | OPHRDC Male | OPHRDC Female | Primary data source total | OPHRDC total | p_value    |
|------------------------------------------------|-------------------------|---------------------------|-------------|---------------|---------------------------|--------------|------------|
| Family practice and general practice           | 7675                    | 6639                      | 7595        | 6752          | 14314                     | 14347        | 0.10441599 |
| Psychiatry                                     | 1247                    | 941                       | 1219        | 936           | 2188                      | 2155         | 0.70321896 |
| Internal Medicine                              | 1236                    | 561                       | 817         | 385           | 1797                      | 1202         | 0.47661068 |
| Anesthesiology                                 | 936                     | 443                       | 916         | 434           | 1379                      | 1350         | 1          |
| Pediatrics                                     | 504                     | 702                       | 666         | 901           | 1206                      | 1567         | 0.63833133 |
| Diagnostic Radiology                           | 835                     | 331                       | 756         | 304           | 1166                      | 1060         | 0.85104654 |
| Obstetrics and Gynecology                      | 384                     | 534                       | 360         | 516           | 918                       | 876          | 0.67552753 |
| General Surgery                                | 618                     | 222                       | 525         | 182           | 840                       | 707          | 0.67793325 |
| Orthopedic Surgery                             | 592                     | 58                        | 510         | 42            | 650                       | 552          | 0.23407916 |
| Cardiology                                     | 522                     | 119                       | 549         | 114           | 641                       | 663          | 0.38593732 |
| Ophthalmology                                  | 375                     | 104                       | 360         | 100           | 479                       | 460          | 1          |
| Neurology                                      | 276                     | 146                       | 260         | 132           | 422                       | 392          | 0.72633488 |
| Pathology, microbiology, clinical biochemistry | 191                     | 117                       | 346         | 259           | 308                       | 605          | 0.09832414 |
| Urology                                        | 281                     | 19                        | 266         | 17            | 300                       | 283          | 0.90738639 |
| Otolaryngology                                 | 232                     | 57                        | 227         | 55            | 289                       | 282          | 0.98403932 |
| Gastroenterology                               | 217                     | 70                        | 260         | 75            | 287                       | 335          | 0.45753526 |
| Respiratory Disease                            | 188                     | 96                        | 206         | 104           | 284                       | 310          | 0.97768366 |
| Emergency Medicine                             | 176                     | 79                        | 266         | 126           | 255                       | 392          | 0.74107424 |
| Plastic Surgery                                | 173                     | 67                        | 173         | 64            | 240                       | 237          | 0.8059238  |
| Endocrinology                                  | 103                     | 136                       | 115         | 136           | 239                       | 251          | 0.43585887 |
| Dermatology                                    | 124                     | 114                       | 115         | 111           | 238                       | 226          | 0.75626949 |
| Therapeutic Radiology                          | 154                     | 62                        | 153         | 55            | 216                       | 208          | 0.49874984 |
| Physical Medicine                              | 135                     | 75                        | 136         | 77            | 210                       | 213          | 0.95241161 |
| Rheumatology                                   | 100                     | 104                       | 99          | 108           | 204                       | 207          | 0.78625246 |
| Nephrology                                     | 129                     | 55                        | 183         | 78            | 184                       | 261          | 1          |
| Infectious Disease                             | 87                      | 67                        | 93          | 54            | 154                       | 147          | 0.09699344 |
| Hematology                                     | 74                      | 68                        | 121         | 92            | 142                       | 213          | 0.29615307 |

|                        |    |    |     |     |     |     |                |
|------------------------|----|----|-----|-----|-----|-----|----------------|
| Geriatrics             | 55 | 77 | 67  | 78  | 132 | 145 | 0.3375637<br>4 |
| Cardiothoracic Surgery | 82 | 11 | 84  | 11  | 93  | 95  | 1              |
| Neurosurgery           | 81 | 6  | 101 | 9   | 87  | 110 | 0.8089303<br>7 |
| Medical Oncology       | 38 | 30 | 143 | 131 | 68  | 274 | 0.6254116<br>1 |
| Vascular Surgery       | 62 | 6  | 83  | 7   | 68  | 90  | 0.9238464<br>6 |
| Nuclear Medicine       | 42 | 12 | 67  | 21  | 54  | 88  | 0.9018308<br>8 |
| Thoracic Surgery       | 37 | 7  | 48  | 8   | 44  | 56  | 0.9264449      |
| Clinical Immunology    | 21 | 15 | 43  | 32  | 36  | 75  | 1              |
| Genetics               | 7  | 22 | 13  | 30  | 29  | 43  | 0.6083248      |
